# Supplementary material for: Acetylcholine facilitates localized synaptic potentiation and location specific feature binding
Source: Frontiers journal article supplement (doi:10.3389/fncir.2023.1239096), 2023-11-10
Supplement: Image_1.pdf [file Image_1.pdf]

# Acetylcholine facilitates localized synaptic potentiation and location specific feature binding

Yihao Yang<sup>1</sup>, Victoria Booth<sup>2\*</sup>, Michal Zochowski<sup>3\*</sup>,

<sup>1</sup>Department of Physics, University of Michigan, Ann Arbor, MI, United States of America

<sup>2</sup>Departments of Mathematics and Anesthesiology, University of Michigan, Ann Arbor, MI, United States of America

<sup>3</sup>Department of Physics and Biophysics Program, University of Michigan, Ann Arbor, MI, United States of America

\*Corresponding authors

E-mail: [michalz@umich.edu](mailto:michalz@umich.edu) (MZ) and [vbooth@umich.edu](mailto:vbooth@umich.edu) (VB)

## Supplemental Figure 1

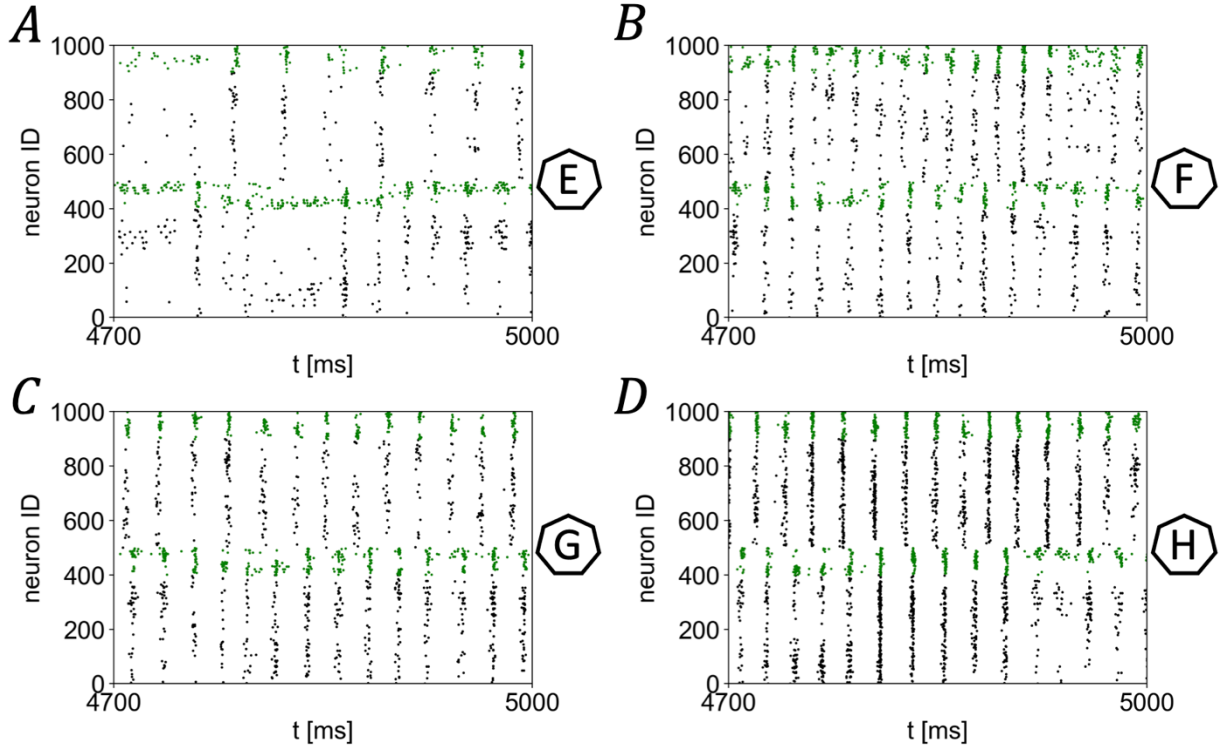

Supplementary Figure 1. **Network dynamics in the absence of plasticity.** (A-D) Raster plots (black: E-cells; green: I-cells) of 300 ms for the example cases E, F, G, H with 5 Hz noise as in the results shown in the 3<sup>rd</sup> column of Figure 3 E,F,G,H, except without STDP. The  $g_{Ks}$  level and DC input for module 2 are fixed at  $g_{Ks}=0.6$  mS/cm<sup>2</sup> and DC=2.0  $\mu$ A/cm<sup>2</sup>, respectively. (A) The  $g_{Ks}$  level and DC input for module 1 are 0.3 mS/cm<sup>2</sup> and 0.5  $\mu$ A/cm<sup>2</sup>. (B) The  $g_{Ks}$  level and DC input for module 1 are 0.6 mS/cm<sup>2</sup> and 3.0  $\mu$ A/cm<sup>2</sup> respectively. (C) The  $g_{Ks}$  level and DC input for module 1 are 1.2 mS/cm<sup>2</sup> and 2.0  $\mu$ A/cm<sup>2</sup> respectively. (D) The  $g_{Ks}$  level and DC input for module 1 are 1.2 mS/cm<sup>2</sup> and 3.5  $\mu$ A/cm<sup>2</sup> respectively.
